# Supplementary material for: Phytosynthesis of Zinc Oxide Nanoparticles Using Ceratonia siliqua L. and Evidence of Antimicrobial Activity
Source: MDPI journal article supplement (doi:10.3390/plants11223079), 2022-11-14
Supplement: s1 [file s1]

## **Phytosynthesis of zinc oxide nanoparticles using *Ceratonia siliqua* L. and evidence of antimicrobial activity**

**Inès Karmous<sup>1,2,3</sup>, Fadia Ben Taheur<sup>4</sup>, Nubia Zuverza-Mena<sup>3</sup>, Samira Jebahi<sup>1,5</sup>, Shital Vaidya<sup>3</sup>, Samir Tlahig<sup>1,6</sup>, Mohsen Mhadhbi<sup>5</sup>, Mustapha Gorai<sup>1</sup>, Amel Raouafi<sup>7</sup>, Mohamed Debara<sup>6</sup>, Talel Bouhamda<sup>6</sup> and Christian O. Dimkpa<sup>3\*</sup>**

- <sup>1</sup>. Institute of Applied Biology of Medenine (ISBAM), University of Gabes, 4100, Medenine, Tunisia;
- <sup>2</sup>. Plant Toxicology and Molecular Biology of Microorganisms, Faculty of Sciences of Bizerta, Zarzouna, Tunisia.
- <sup>3</sup>. The Connecticut Agricultural Experiment Station. 123 Huntington, New Haven, CT 06511, Connecticut, USA.
- <sup>4</sup>. Laboratory of Analysis, Treatment and Valorization of Environmental Pollutants and Products, Faculty of Pharmacy, University of Monastir, Rue Ibn Sina, Monastir 5000, Tunisia.
- <sup>5</sup>. Centre National des Sciences et Technologies Nucléaires (CNSTN). Rte de Tunis 2020, Sidi Thabet Ariana, Tunisia.
- <sup>6</sup>. Arid Region Institute, 4100, Medenine, Tunisia.
- <sup>7</sup>. Institut National de Recherche et d'Analyse Physico-chimique (INRAP), Tunisia.

\* Correspondence: Corresponding author: C. Dimkpa: Email: [Christian.Dimkpa@ct.gov](mailto:Christian.Dimkpa@ct.gov)

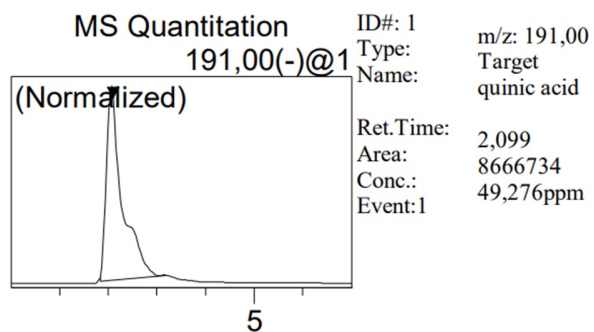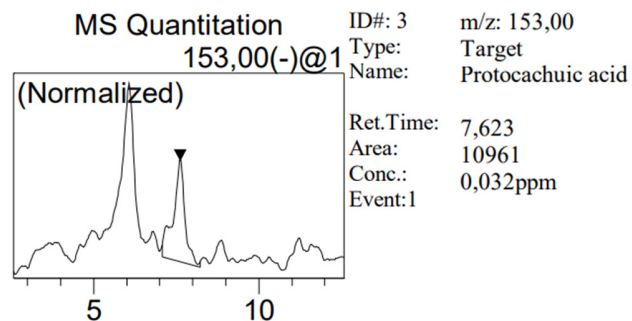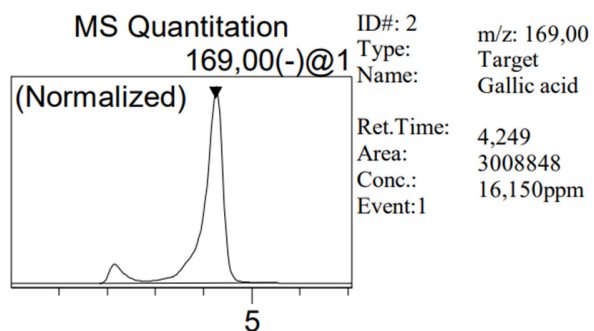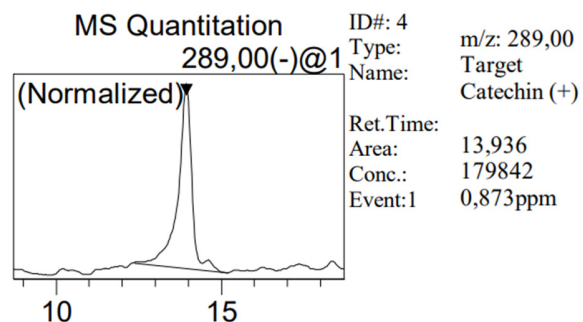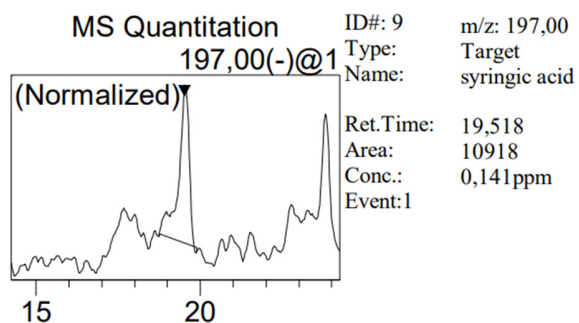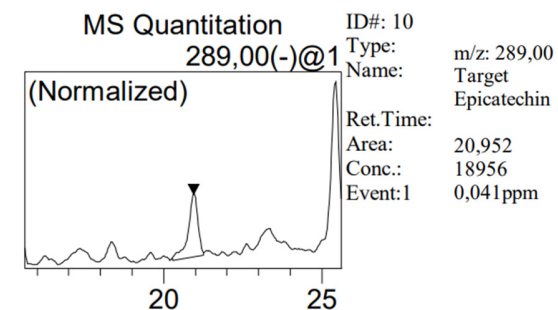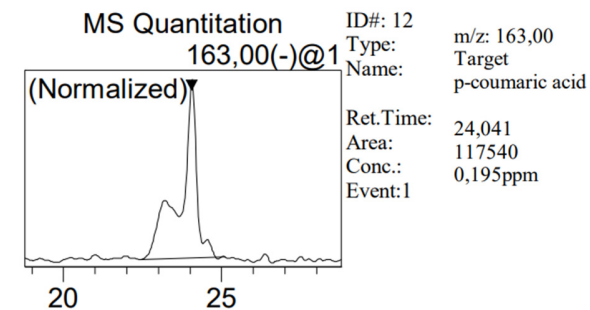

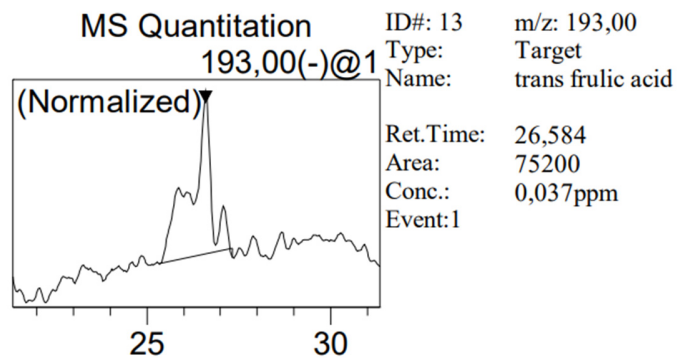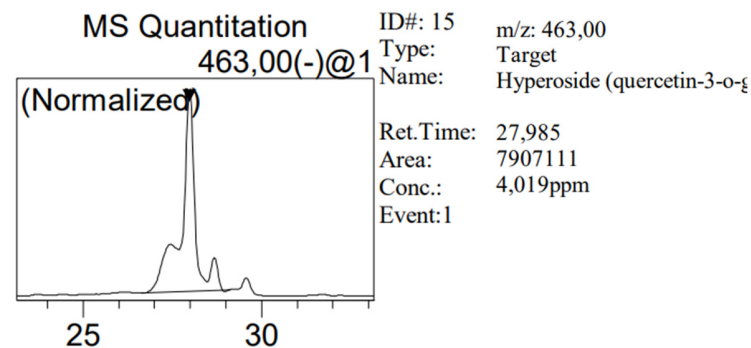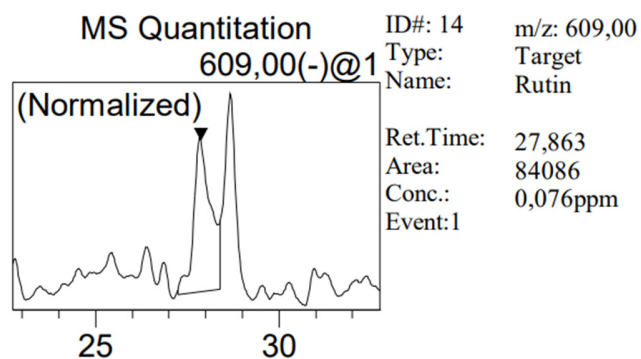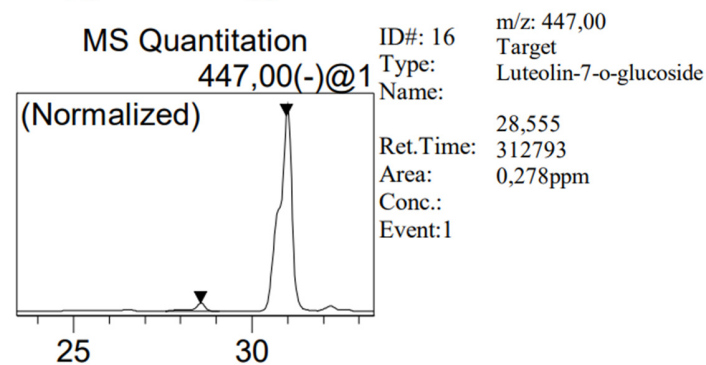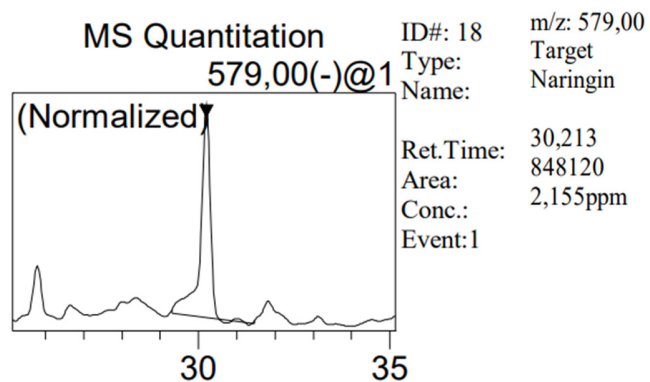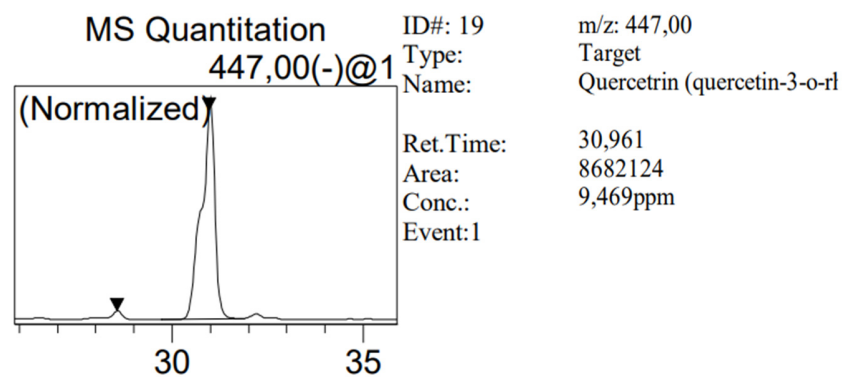

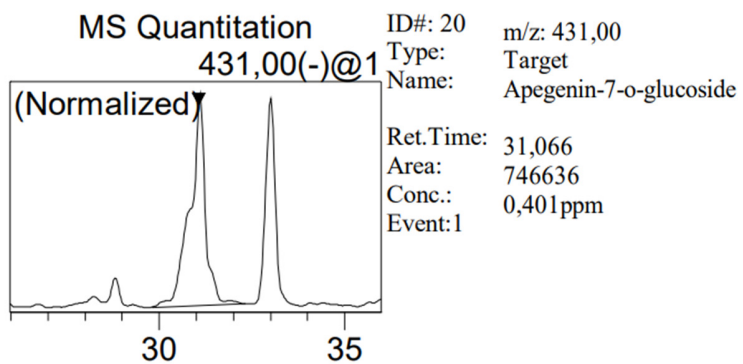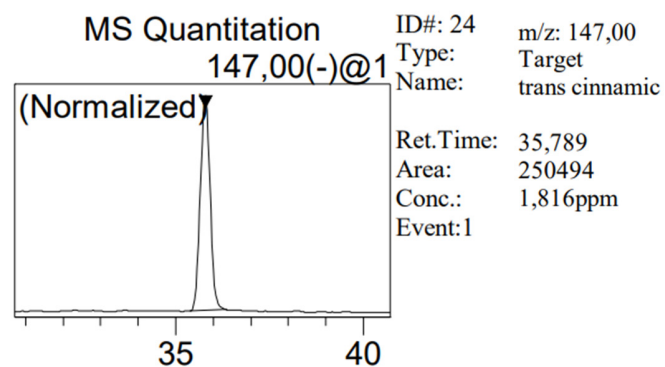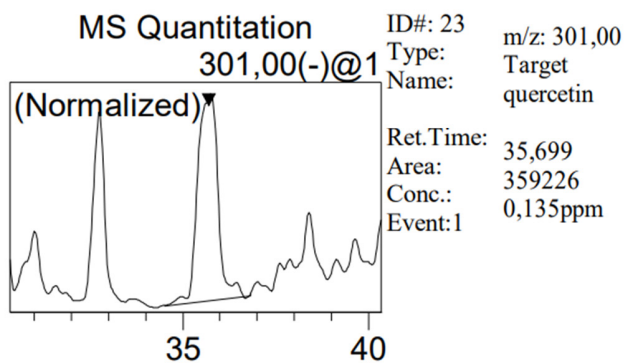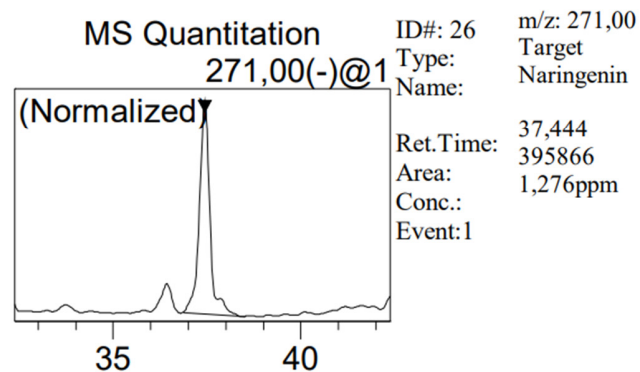

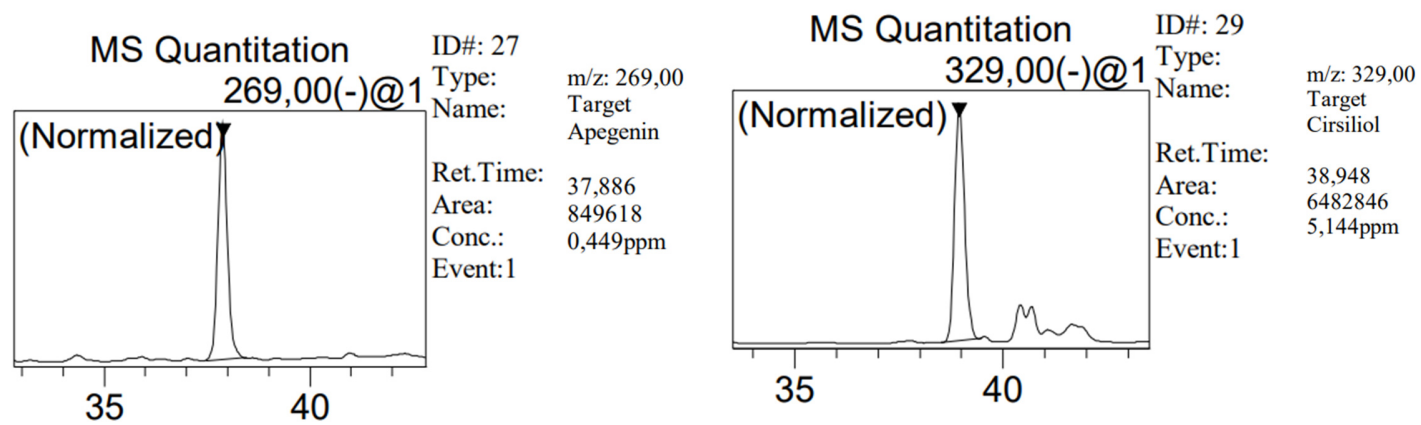

**Figure S1** Chromatographs of total phenolic compounds analyzed by HPLC-MS.
